# Supplementary material for: ZM-306416 prevents ovariectomy-induced bone loss by promoting osteoblastogenesis and inhibiting osteoclastogenesis
Source: Research Square preprint supplement (doi:10.21203/rs.3.rs-7828854/v1), 2025-11-24
Supplement: Supplementary file 1 [file bec9fba3a494d979a340074c.docx]

**Table S1. Nucleotide sequences of primers used for qPCR**

| Gene | Sequence |
| --- | --- |
| *Bglap* | Forward: CAGACACCATGAGGACCATCTT |
|  | Reverse: AAGGCTTTGTCAGACTCAGGG |
| *Runx2* | Forward: GACTGTGGTTACCGTCATGGC |
|  | Reverse: ACTTGGTTTTTCATAACAGCGGA |
| *Alpl* | Forward: CCAACTCTTTTGTGCCAGAGA |
|  | Reverse: GGCTACATTGGTGTTGAGCTTTT |
| *Acp5* | Forward: CACTCCCACCCTGAGATTTGT |
|  | Reverse: CCCCAGAGACATGATGAAGTCA |
| *Ctsk* | Forward: CTCGGCGTTTAATTTGGGAGA |
|  | Reverse: TCGAGAGGGAGGTATTCTGAGT |
| *Gapdh* | Forward: AAATGGTGAAGGTCGGTGTGAAC |
|  | Reverse: CAACAATCTCCACTTTGCCACTG |
